# Supplementary material for: Polycrystalline Formamidinium Lead Bromide X-ray Detectors
Source: MDPI journal article supplement (doi:10.3390/app12042013), 2022-02-15
Supplement: s1 [file s1]

Archive with 1 entries (1 files):
- applsci-1540502-SI.pdf
